# Supplementary material
Source: Springer Nature journal article supplement (http://www.nature.com/nature/journal/v444/n7116/extref/444146a-s1.pdf)
Supplement: 444146a-s1.pdf [file 444146a-s1.pdf]

# An open letter to President Muammar al-Gaddafi

List of the 110 Nobel laureates who are signatories to the letter published at doi:10.1038/444146a

|                                |                                                 |
|--------------------------------|-------------------------------------------------|
| <b>Philip W. Anderson</b>      | Nobel Laureate in Physics (1977)                |
| <b>Werner Arber</b>            | Nobel Laureate in Physiology or Medicine (1978) |
| <b>David Baltimore</b>         | Nobel Laureate in Physiology or Medicine (1975) |
| <b>J. Georg Bednorz</b>        | Nobel Laureate in Physics (1987)                |
| <b>Baruj Benacerraf</b>        | Nobel Laureate in Physiology or Medicine (1980) |
| <b>Paul Berg</b>               | Nobel Laureate in Chemistry (1980)              |
| <b>J. Michael Bishop</b>       | Nobel Laureate in Physiology or Medicine (1989) |
| <b>James W. Black</b>          | Nobel Laureate in Physiology or Medicine (1988) |
| <b>Gunter Blobel</b>           | Nobel Laureate in Physiology or Medicine (1999) |
| <b>Baruch S. Blumberg</b>      | Nobel Laureate in Physiology or Medicine (1976) |
| <b>Paul D. Boyer</b>           | Nobel Laureate in Chemistry (1997)              |
| <b>Sydney Brenner</b>          | Nobel Laureate in Physiology or Medicine (2002) |
| <b>Linda B. Buck</b>           | Nobel Laureate in Physiology or Medicine (2004) |
| <b>Arvid Carlsson</b>          | Nobel Laureate in Physiology or Medicine (2000) |
| <b>Steven Chu</b>              | Nobel Laureate in Physics (1997)                |
| <b>Stanley Cohen</b>           | Nobel Laureate in Physiology or Medicine (1986) |
| <b>Claude Cohen-Tannoudji</b>  | Nobel Laureate in Physics (1997)                |
| <b>Leon N. Cooper</b>          | Nobel Laureate in Physics (1972)                |
| <b>Eric A. Cornell</b>         | Nobel Laureate in Physics (2001)                |
| <b>Paul J. Crutzen</b>         | Nobel Laureate in Chemistry (1995)              |
| <b>Robert F. Curl, Jr</b>      | Nobel Laureate in Chemistry (1996)              |
| <b>Pierre-Gilles De Gennes</b> | Nobel Laureate in Physics (1991)                |
| <b>Johann Deisenhofer</b>      | Nobel Laureate in Chemistry (1988)              |
| <b>Peter C. Doherty</b>        | Nobel Laureate in Physiology or Medicine (1996) |
| <b>Renato Dulbecco</b>         | Nobel Laureate in Physiology or Medicine (1975) |
| <b>Gerald M. Edelman</b>       | Nobel Laureate in Physiology or Medicine (1972) |
| <b>Manfred Eigen</b>           | Nobel Laureate in Chemistry (1967)              |
| <b>Richard R. Ernst</b>        | Nobel Laureate in Chemistry (1991)              |
| <b>Andrew Z. Fire</b>          | Nobel Laureate in Physiology or Medicine (2006) |
| <b>Edmond H. Fischer</b>       | Nobel Laureate in Physiology or Medicine (1992) |
| <b>Val L. Fitch</b>            | Nobel Laureate in Physics (1980)                |
| <b>Jerome I. Friedman</b>      | Nobel Laureate in Physics (1990)                |
| <b>Robert F. Furchgott</b>     | Nobel Laureate in Physiology or Medicine (1998) |
| <b>Ivar Giaever</b>            | Nobel Laureate in Physics (1973)                |
| <b>Walter Gilbert</b>          | Nobel Laureate in Chemistry (1980)              |
| <b>Alfred G. Gilman</b>        | Nobel Laureate in Physiology or Medicine (1994) |
| <b>Donald A. Glaser</b>        | Nobel Laureate in Physics (1960)                |
| <b>Sheldon L. Glashow</b>      | Nobel Laureate in Physics (1979)                |
| <b>Roy J. Glauber</b>          | Nobel Laureate in Physics (2005)                |
| <b>Paul Greengard</b>          | Nobel Laureate in Physiology or Medicine (2000) |
| <b>David J. Gross</b>          | Nobel Laureate in Physics (2004)                |
| <b>Roger Guillemin</b>         | Nobel Laureate in Physiology or Medicine (1977) |
| <b>John L. Hall</b>            | Nobel Laureate in Physics (2005)                |
| <b>Leland H. Hartwell</b>      | Nobel Laureate in Physiology or Medicine (2001) |
| <b>Dudley R. Herschbach</b>    | Nobel Laureate in Chemistry (1986)              |
| <b>Antony Hewish</b>           | Nobel Laureate in Physics (1974)                |
| <b>Roald Hoffmann</b>          | Nobel Laureate in Chemistry (1981)              |
| <b>H. Robert Horvitz</b>       | Nobel Laureate in Physiology or Medicine (2002) |
| <b>Robert Huber</b>            | Nobel Laureate in Chemistry (1981)              |
| <b>Russell A. Hulse</b>        | Nobel Laureate in Physics (1993)                |
| <b>Tim Hunt</b>                | Nobel Laureate in Physiology or Medicine (2001) |
| <b>Andrew F. Huxley</b>        | Nobel Laureate in Physiology or Medicine (1963) |
| <b>Brian D. Josephson</b>      | Nobel Laureate in Physics (1973)                |
| <b>Wolfgang Ketterle</b>       | Nobel Laureate in Physics (2001)                |

## SUPPLEMENTARY INFORMATION

|                              |                                                 |
|------------------------------|-------------------------------------------------|
| <b>Har Gobind Khorana</b>    | Nobel Laureate in Physiology or Medicine (1968) |
| <b>Aaron Klug</b>            | Nobel Laureate in Chemistry (1982)              |
| <b>Arthur Kornberg</b>       | Nobel Laureate in Physiology or Medicine (1959) |
| <b>Roger Kornberg</b>        | Nobel Laureate in Chemistry (2006)              |
| <b>Edwin G. Krebs</b>        | Nobel Laureate in Physiology or Medicine (1992) |
| <b>Herbert Kroemer</b>       | Nobel Laureate in Physics (2000)                |
| <b>Harold W. Kroto</b>       | Nobel Laureate in Chemistry (1996)              |
| <b>Paul C. Lauterbur</b>     | Nobel Laureate in Physiology or Medicine (2003) |
| <b>Leon M. Lederman</b>      | Nobel Laureate in Physics (1988)                |
| <b>Yuan T. Lee</b>           | Nobel Laureate in Chemistry (1986)              |
| <b>Anthony J. Leggett</b>    | Nobel Laureate in Physics (2003)                |
| <b>William N. Lipscomb</b>   | Nobel Laureate in Chemistry (1976)              |
| <b>Rudolph Marcus</b>        | Nobel Laureate in Chemistry (1992)              |
| <b>Barry Marshall</b>        | Nobel Laureate in Physiology or Medicine (2005) |
| <b>John C. Mather</b>        | Nobel Laureate in Physics (2006)                |
| <b>Craig C. Mello</b>        | Nobel Laureate in Physiology or Medicine (2006) |
| <b>Kary Mullis</b>           | Nobel Laureate in Chemistry (1993)              |
| <b>Ferid Murad</b>           | Nobel Laureate in Physiology or Medicine (1998) |
| <b>Joseph E. Murray</b>      | Nobel Laureate in Physiology or Medicine (1990) |
| <b>Erwin Neher</b>           | Nobel Laureate in Physiology or Medicine (1991) |
| <b>Marshall W. Nirenberg</b> | Nobel Laureate in Physiology or Medicine (1968) |
| <b>Paul M. Nurse</b>         | Nobel Laureate in Physiology or Medicine (2001) |
| <b>George A. Olah</b>        | Nobel Laureate in Chemistry (1994)              |
| <b>Douglas D. Osheroff</b>   | Nobel Laureate in Physics (1996)                |
| <b>Arno A. Penzias</b>       | Nobel Laureate in Physics (1978)                |
| <b>William D. Phillips</b>   | Nobel Laureate in Physics (1997)                |
| <b>John C. Polanyi</b>       | Nobel Laureate in Chemistry (1986)              |
| <b>H. David Politzer</b>     | Nobel Laureate in Physics (2004)                |
| <b>Stanley B. Prusiner</b>   | Nobel Laureate in Physiology or Medicine (1997) |
| <b>Richard J. Roberts</b>    | Nobel Laureate in Physiology or Medicine (1993) |
| <b>Heinrich Rohrer</b>       | Nobel Laureate in Physics (1986)                |
| <b>F. Sherwood Rowland</b>   | Nobel Laureate in Chemistry (1995)              |
| <b>Bert Sakmann</b>          | Nobel Laureate in Physiology or Medicine (1991) |
| <b>Bengt I. Samuelsson</b>   | Nobel Laureate in Physiology or Medicine (1982) |
| <b>Frederick Sanger</b>      | Nobel Laureate in Chemistry (1958, 1980)        |
| <b>Richard Schrock</b>       | Nobel Laureate in Chemistry (2005)              |
| <b>Phillip A. Sharp</b>      | Nobel Laureate in Physiology or Medicine (1993) |
| <b>K. Barry Sharpless</b>    | Nobel Laureate in Chemistry (2001)              |
| <b>Jens C. Skou</b>          | Nobel Laureate in Chemistry (1997)              |
| <b>Hamilton O. Smith</b>     | Nobel Laureate in Physiology or Medicine (1978) |
| <b>John E. Sulston</b>       | Nobel Laureate in Physiology or Medicine (2002) |
| <b>Richard E. Taylor</b>     | Nobel Laureate in Physics (1990)                |
| <b>Gerardus t'Hooft</b>      | Nobel Laureate in Physics (1999)                |
| <b>E. Donnall Thomas</b>     | Nobel Laureate in Physiology or Medicine (1990) |
| <b>Susumu Tonegawa</b>       | Nobel Laureate in Physiology or Medicine (1987) |
| <b>Charles H. Townes</b>     | Nobel Laureate in Physics (1964)                |
| <b>Harold E. Varmus</b>      | Nobel Laureate in Physiology or Medicine (1989) |
| <b>Klaus Von Klitzing</b>    | Nobel Laureate in Physics (1985)                |
| <b>Robin J. Warren</b>       | Nobel Laureate in Physiology or Medicine (2005) |
| <b>James D. Watson</b>       | Nobel Laureate in Physiology or Medicine (1962) |
| <b>Steven Weinberg</b>       | Nobel Laureate in Physics (1979)                |
| <b>Eric F. Wieschaus</b>     | Nobel Laureate in Physiology or Medicine (1995) |
| <b>Torsten N. Wiesel</b>     | Nobel Laureate in Physiology or Medicine (1981) |
| <b>Frank Wilczek</b>         | Nobel Laureate in Physics (2004)                |
| <b>Robert W. Wilson</b>      | Nobel Laureate in Physics (1978)                |
| <b>Kurt Wuthrich</b>         | Nobel Laureate in Chemistry (2002)              |
